# Supplementary material
Source: PubMed Central journal article supplement (PMC4617311)
Supplement: NIHMS704098-supplement-Supplementary_materials.pdf [file NIHMS704098-supplement-Supplementary_materials.pdf]

## *Supplementary Material for: Networks' Characteristics Matter for Systems Biology*

Andrew K. Rider<sup>1,3,4</sup>, Tijana Milenković<sup>1,3,4</sup>, Geoffrey H. Siwo<sup>2,3,4</sup>, Richard S. Pinapati<sup>2,3,4</sup>, Scott J. Emrich<sup>1,3,4</sup>, Michael T. Ferdig<sup>2,3,4</sup>, Nitesh V. Chawla<sup>1,3,4,\*</sup>

<sup>1</sup>Department of Computer Science and Engineering

<sup>2</sup>Department of Biological Sciences

<sup>3</sup>ECK Institute for Global Health

<sup>4</sup>Interdisciplinary Center for Network Science and Applications (iCeNSA)

University of Notre Dame, Notre Dame IN 46556, USA

\*Corresponding Author (E-mail: [nchawla@nd.edu](mailto:nchawla@nd.edu))

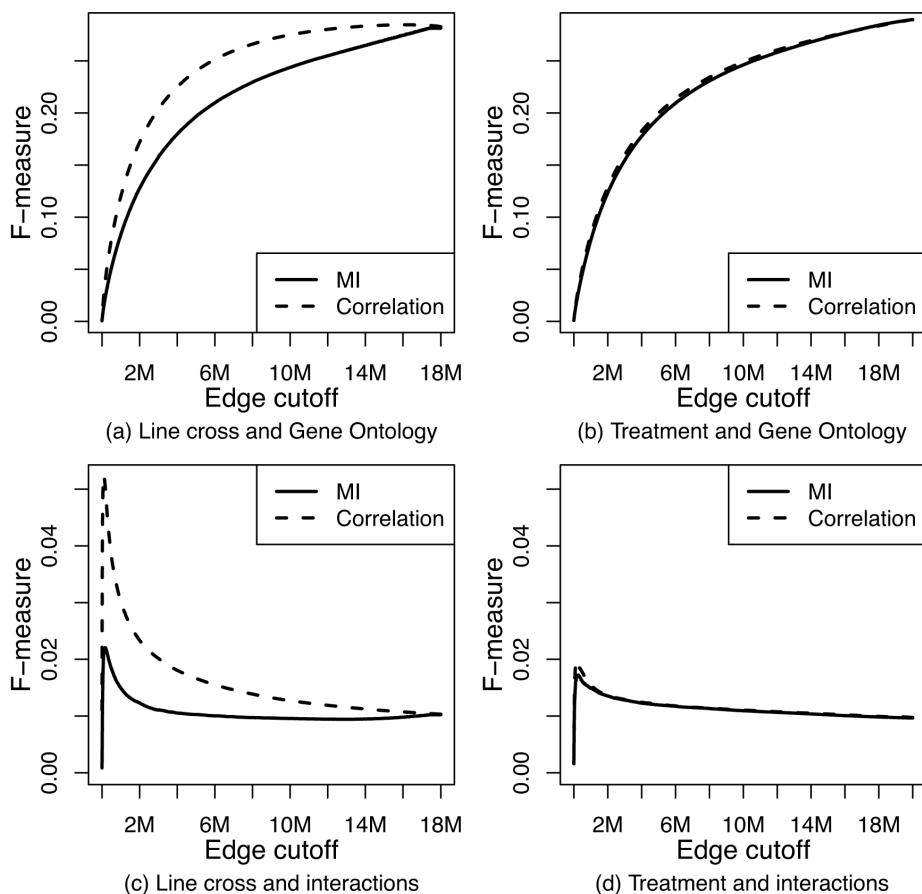

Supporting Figure 1. F-scores at different edge cut-offs measuring how accurately networks constructed in different ways capture known biological knowledge. Panel (a) shows F-scores for networks constructed from the line cross data with respect to shared GO terms. Panel (b) shows F-scores for networks constructed from the treatment data with respect to shared GO terms. Panel (c) shows F-scores for networks constructed from the line cross data with respect to known interactions. Panel (d) shows F-scores for networks constructed from the treatment data with respect to known interactions.

Supplementary Material for: Networks' Characteristics Matter for Systems Biology 3

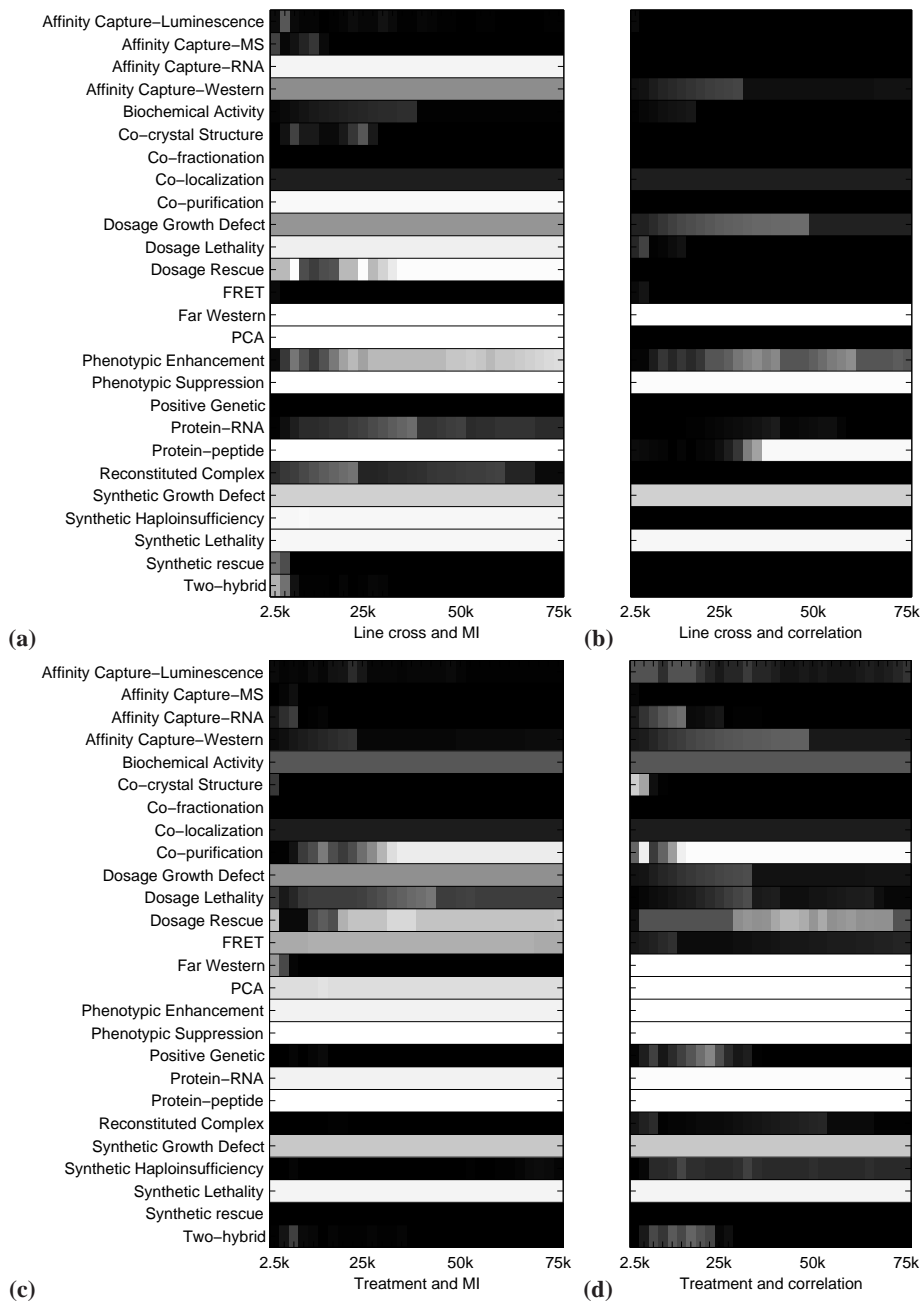

Supporting Figure 2. Heat maps showing the significance of the enrichment of a network of a given size (*x*-axis) in known interactions of a given type (*y*-axis) according to the hypergeometric test (see Methods). Significance is denoted by the darkness of the color, black being the most significant; significance diminishes as the color approaches white. Panel (a) shows enrichment results for networks constructed from the line cross data using mutual information. Panel (b) shows enrichment results for networks constructed from the line cross data using correlation. Panel (c) shows enrichment results for networks constructed from the treatment data using mutual information. Panel (d) shows enrichment results for networks constructed from the treatment data using correlation.

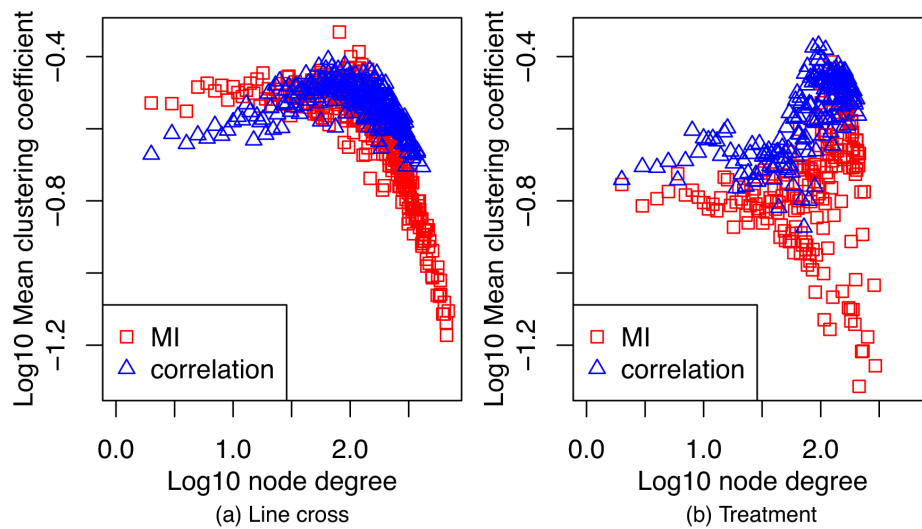

Supporting Figure 3. Clustering spectra for networks constructed from the line cross data (a) and the treatment data (b) at the edge cut-off of 25,000. We compared with a  $t$ -test pairs of blue and red spectra within panels, which share the same data type but differ in the edge weighting method. We also compared pairs of blue and blue spectra or red and red spectra across panels, which share the same edge weighting method but differ in the data type. The two spectra in panel (a) as well as the two spectra in panel (b) were statistically significantly different with  $p$ -values  $< 2.2 \times 10^{-16}$ . The two correlation-based spectra (blue) across the two panels were statistically significantly different with a  $p$ -value of 0.008. The two mutual information-based spectra (red) across the two panels were statistically significantly different with a  $p$ -value of  $1.07 \times 10^{-15}$ .

## Supplementary Material for: Networks' Characteristics Matter for Systems Biology 5

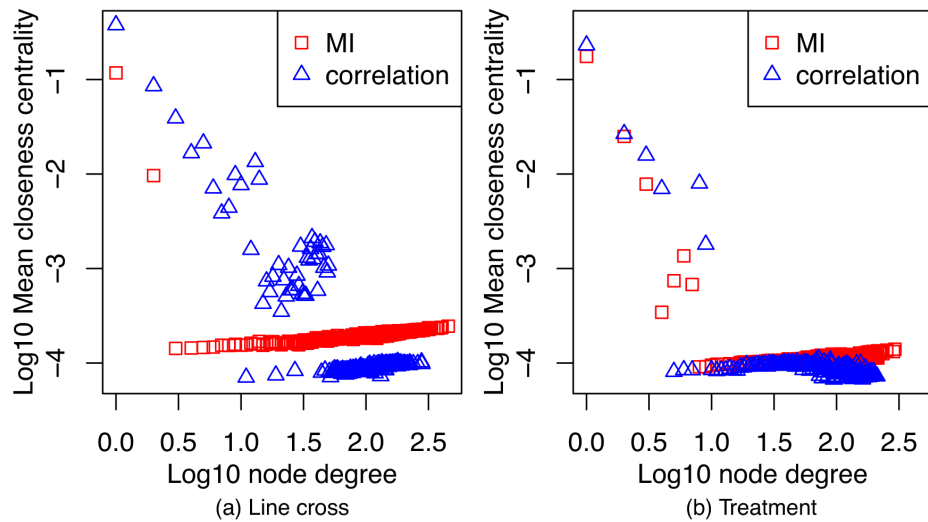

Supporting Figure 4. Closeness spectra for networks constructed from the the line cross data (a) and the treatment data (b) at the edge cut-off of 25,000. We compared with a *t*-test pairs of blue and red spectra within panels, which share the same data type but differ in the edge weighting method. We also compared pairs of blue and blue spectra or red and red spectra across panels, which share the same edge weighting method but differ in the data type. The two spectra in panel (a) were not statistically significantly different (*p*-value of 0.3511). The two spectra in panel (b) were statistically significantly different with a *p*-value of 0.0063. The two correlation-based spectra (blue) across the two panels were statistically significantly different with a *p*-value of  $2.81 \times 10^{-6}$ . The two mutual information-based spectra (red) across the two panels were statistically significantly different with a *p*-value of  $1.6 \times 10^{-12}$ .

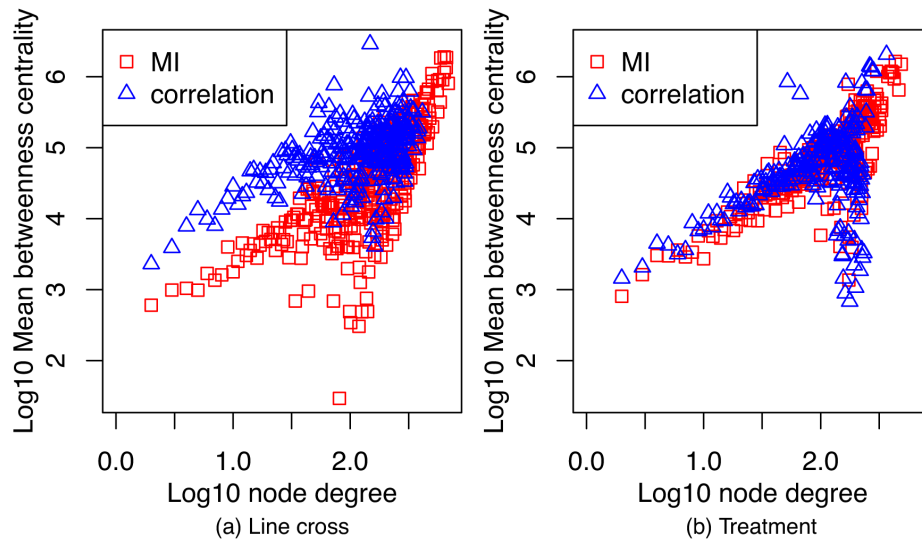

Supporting Figure 5. Betweenness spectra for networks constructed from the the line cross data **(a)** and the treatment data **(b)** at the edge cut-off of 25,000. We compared with a  $t$ -test pairs of blue and red spectra within panels, which share the same data type but differ in the edge weighting method. We also compared pairs of blue and blue spectra or red and red spectra across panels, which share the same edge weighting method but differ in the data type. The two spectra in panel **(a)** as well as the two spectra in panel **(b)** were statistically significantly different with  $p$ -values  $< 2.2 \times 10^{-16}$ . The two correlation-based spectra (blue) across the two panels were statistically significantly different with a  $p$ -value of  $3.3 \times 10^{-7}$ . The two mutual information-based spectra (red) across the two panels were statistically significantly different with a  $p$ -value of  $9.6 \times 10^{-11}$ .

*Supplementary Material for: Networks' Characteristics Matter for Systems Biology 7*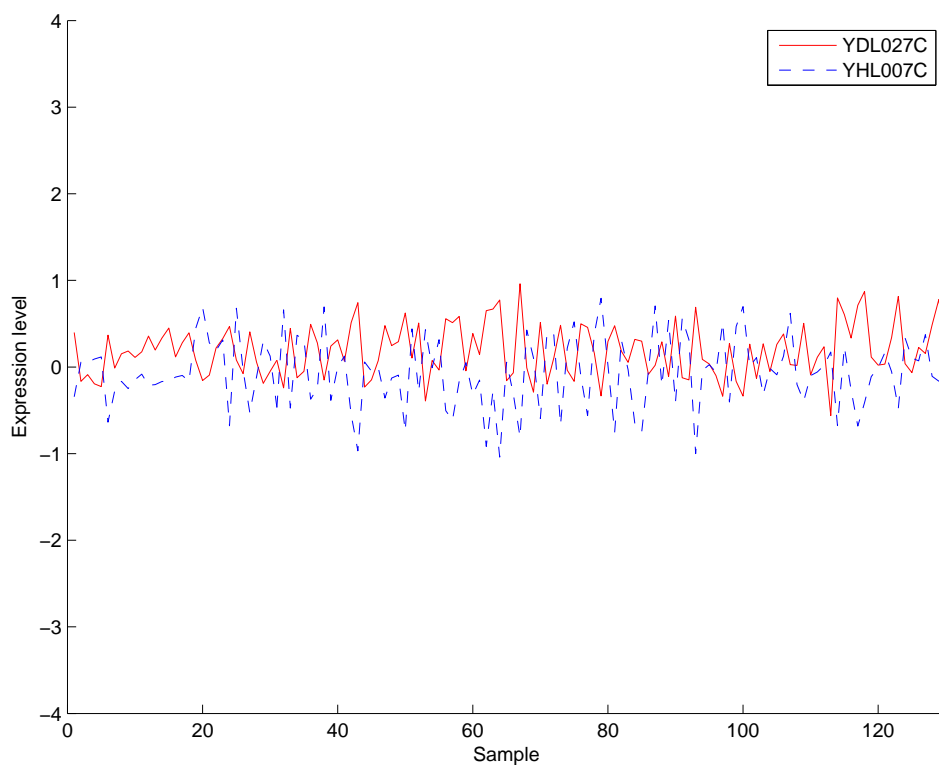

Supporting Figure 6. Expression levels in the line cross data of two genes that share a known Biochemical Activity interaction and for which the correlation is low while the mutual information is high. Namely, the correlation has a value of  $-0.742330$  and the mutual information has a value of  $0.157230$ . The correlation between these two genes is greater than the correlation between 0% of all pairs of genes in the data. The mutual information between these two genes is greater than the mutual information between 99.2% of all pairs of genes in the data.

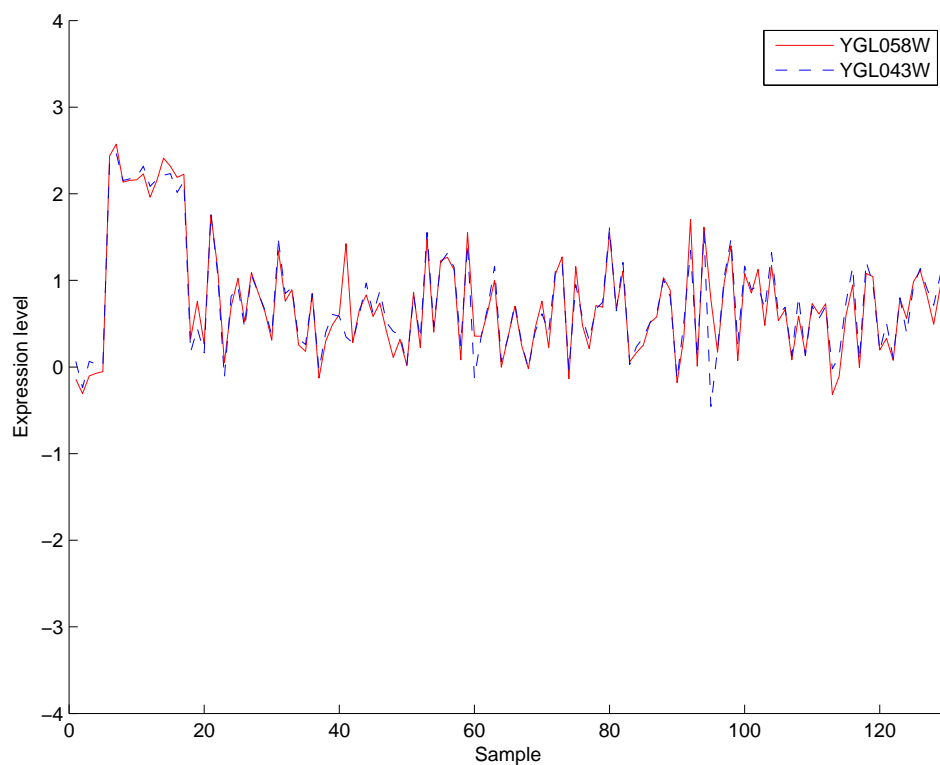

Supporting Figure 7. Expression levels in the line cross data of two genes that share a known Synthetic Lethality interaction and for which both the correlation and the mutual information are high. Namely, the correlation has a value of 0.958520 and the mutual information has a value of 0.863000. The correlation between these two genes is greater than the correlation of 99.8% of all pairs of genes in the data. The mutual information between these two genes is greater than the mutual information between 99.9% of all pairs of genes in the data.



*Supplementary Material for: Networks' Characteristics Matter for Systems Biology* 9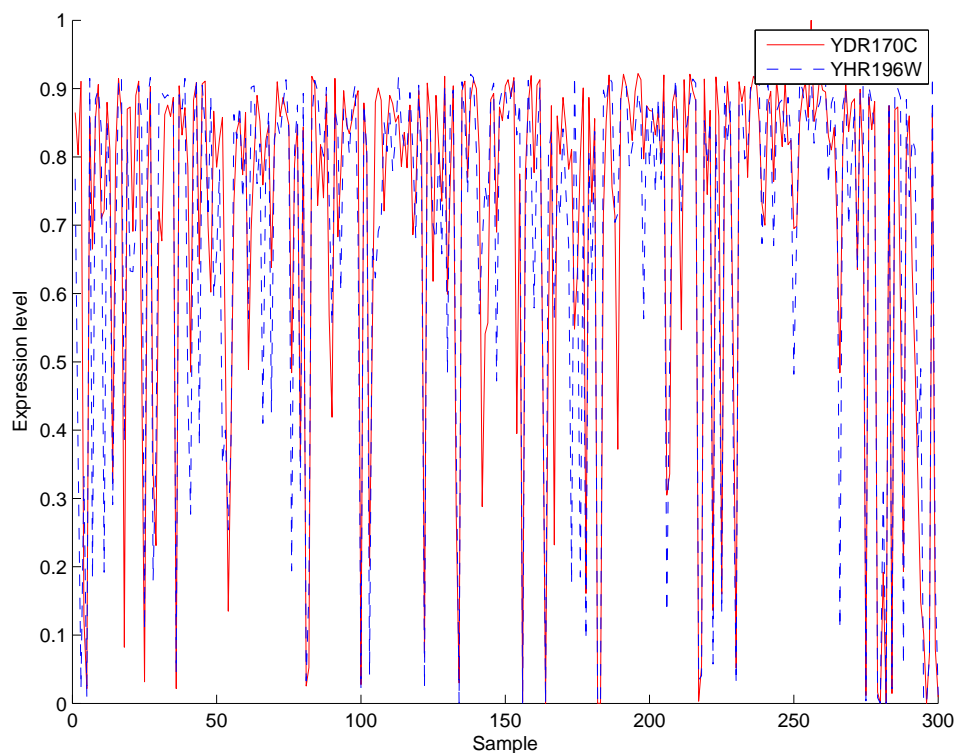

Supporting Figure 8. Expression levels in the treatment data of two genes that share a known Synthetic Lethality interaction and for which both the correlation and the mutual information are high. Namely, the correlation has a value of 0.858660 and the mutual information has a value of 0.347460. The correlation between these two genes is greater than the correlation of 99.7% of all pairs of genes in the data. The mutual information between these two genes is greater than the mutual information between 99.9% of all pairs of genes in the data.

## 1 Tables

**Supporting Table 1.** *P*-values from signed-rank tests comparing different edge weighting methods and data types with respect to the proportion of known interactions of a given type (out of the total number of edges in the network) across 30 networks corresponding to the 30 cut-offs. For each of the 26 known interaction types, for each combination of the edge weighting method and data type, for each of the 30 cut-offs, we compute the proportion of known interactions of the given type out of all edges in the network constructed using the given edge weighting method, data type, and cut-off. Then, we compare the 30 resulting values corresponding to the 30 cut-offs between networks constructed from linecross data using correlation and networks constructed from linecross data using mutual information, between networks constructed from treatment data using correlation and networks constructed from treatment data using mutual information, between networks constructed from linecross data using correlation and networks constructed from treatment data using correlation, and between networks constructed from linecross data using mutual information and networks constructed from treatment data using mutual information. The *p*-value on the left of a given cell in the table tests whether the median rank of the first set of the 30 values is greater than or equal to the median rank of the second set of the 30 values. The *p*-value on the right of the cell tests whether the median rank of the second set of the 30 values is greater than or equal to the median rank of the first set of the 30 values. If the *p*-value is below a given cut-off (see below), the difference in the median ranks between two given sets is considered to be statistically significant (and is bolded in the table). We used the Šidák correction for multiple testing to identify a stringent *p*-value cut-off, corresponding to the 0.05 cut-off. The Šidák correction is similar to the Bonferroni correction but assumes independence of individual tests (Šidák, 1967). The extent to which interaction types are independent is unclear but it is common to assume independence in the case of uncertainty. Correcting for 26 tests corresponding to the 26 known interaction types, the *p*-value cut-off is  $1.7 \times 10^{-03}$ . The “NAs” correspond to no observations being made for the given interaction type. The last row counts the number of known interaction types out of 26 of them for which at least one of the two *p*-values is below the cut-off.

|                               | Line cross & MI v. Line cross & Correlation |                                         | Treatment & MI v. Treatment & Correlation |                                         | Treatment & MI v. Line cross & MI       |                                         | Treatment & Correlation v. Line cross & Correlation |                                         |
|-------------------------------|---------------------------------------------|-----------------------------------------|-------------------------------------------|-----------------------------------------|-----------------------------------------|-----------------------------------------|-----------------------------------------------------|-----------------------------------------|
| Affinity Capture-Luminescence | $1.0 \times 10^{+00}$                       | <b><math>1.3 \times 10^{-06}</math></b> | <b><math>1.5 \times 10^{-05}</math></b>   | $1.0 \times 10^{+00}$                   | <b><math>3.5 \times 10^{-04}</math></b> | $1.0 \times 10^{+00}$                   | <b><math>9.1 \times 10^{-07}</math></b>             | $1.0 \times 10^{+00}$                   |
| Affinity Capture-MS           | $1.0 \times 10^{+00}$                       | <b><math>9.3 \times 10^{-10}</math></b> | $9.8 \times 10^{-01}$                     | $2.4 \times 10^{-02}$                   | $9.8 \times 10^{-01}$                   | $2.4 \times 10^{-02}$                   | <b><math>9.1 \times 10^{-07}</math></b>             | $1.0 \times 10^{+00}$                   |
| Affinity Capture-RNA          | $1.0 \times 10^{+00}$                       | <b><math>9.1 \times 10^{-07}</math></b> | <b><math>4.4 \times 10^{-06}</math></b>   | $1.0 \times 10^{+00}$                   | $1.0 \times 10^{+00}$                   | <b><math>2.9 \times 10^{-06}</math></b> | <b><math>2.9 \times 10^{-05}</math></b>             | $1.0 \times 10^{+00}$                   |
| Affinity Capture-Western      | $1.0 \times 10^{+00}$                       | <b><math>1.1 \times 10^{-04}</math></b> | $3.0 \times 10^{-03}$                     | $1.0 \times 10^{+00}$                   | $1.0 \times 10^{+00}$                   | <b><math>3.2 \times 10^{-05}</math></b> | $1.1 \times 10^{-02}$                               | $9.9 \times 10^{-01}$                   |
| Biochemical Activity          | $1.0 \times 10^{+00}$                       | <b><math>1.6 \times 10^{-04}</math></b> | NA                                        | NA                                      | <b><math>3.6 \times 10^{-04}</math></b> | $1.0 \times 10^{+00}$                   | <b><math>1.4 \times 10^{-05}</math></b>             | $1.0 \times 10^{+00}$                   |
| Co-crystal Structure          | $1.0 \times 10^{+00}$                       | <b><math>9.3 \times 10^{-10}</math></b> | <b><math>3.3 \times 10^{-04}</math></b>   | $1.0 \times 10^{+00}$                   | $1.0 \times 10^{+00}$                   | <b><math>1.2 \times 10^{-05}</math></b> | <b><math>9.1 \times 10^{-07}</math></b>             | $1.0 \times 10^{+00}$                   |
| Co-fractionation              | $1.0 \times 10^{+00}$                       | <b><math>9.1 \times 10^{-07}</math></b> | <b><math>3.2 \times 10^{-04}</math></b>   | $1.0 \times 10^{+00}$                   | <b><math>1.4 \times 10^{-06}</math></b> | $1.0 \times 10^{+00}$                   | <b><math>9.1 \times 10^{-07}</math></b>             | $1.0 \times 10^{+00}$                   |
| Co-localization               | NA                                          | NA                                      | NA                                        | NA                                      | NA                                      | NA                                      | NA                                                  | NA                                      |
| Co-purification               | $1.0 \times 10^{+00}$                       | <b><math>9.1 \times 10^{-07}</math></b> | <b><math>3.6 \times 10^{-04}</math></b>   | $1.0 \times 10^{+00}$                   | $1.0 \times 10^{+00}$                   | <b><math>3.2 \times 10^{-05}</math></b> | <b><math>9.1 \times 10^{-07}</math></b>             | $1.0 \times 10^{+00}$                   |
| Dosage Growth Defect          | $1.0 \times 10^{+00}$                       | $1.9 \times 10^{-03}$                   | $1.0 \times 10^{+00}$                     | <b><math>1.6 \times 10^{-04}</math></b> | NA                                      | NA                                      | $9.9 \times 10^{-01}$                               | $1.8 \times 10^{-02}$                   |
| Dosage Lethality              | $1.0 \times 10^{+00}$                       | <b><math>2.0 \times 10^{-06}</math></b> | $1.0 \times 10^{+00}$                     | <b><math>8.3 \times 10^{-04}</math></b> | $1.0 \times 10^{+00}$                   | <b><math>1.3 \times 10^{-06}</math></b> | <b><math>7.8 \times 10^{-04}</math></b>             | $1.0 \times 10^{+00}$                   |
| Dosage Rescue                 | $1.0 \times 10^{+00}$                       | <b><math>9.1 \times 10^{-07}</math></b> | $9.6 \times 10^{-01}$                     | $4.1 \times 10^{-02}$                   | $2.8 \times 10^{-01}$                   | $7.3 \times 10^{-01}$                   | <b><math>1.3 \times 10^{-06}</math></b>             | $1.0 \times 10^{+00}$                   |
| Far Western                   | $1.0 \times 10^{+00}$                       | $1.9 \times 10^{-03}$                   | <b><math>1.3 \times 10^{-06}</math></b>   | $1.0 \times 10^{+00}$                   | $1.0 \times 10^{+00}$                   | <b><math>1.3 \times 10^{-06}</math></b> | $1.0 \times 10^{+00}$                               | <b><math>4.8 \times 10^{-05}</math></b> |
| FRET                          | <b><math>1.1 \times 10^{-04}</math></b>     | $1.0 \times 10^{+00}$                   | $1.0 \times 10^{+00}$                     | <b><math>2.2 \times 10^{-05}</math></b> | <b><math>1.3 \times 10^{-06}</math></b> | $1.0 \times 10^{+00}$                   | <b><math>2.0 \times 10^{-06}</math></b>             | $1.0 \times 10^{+00}$                   |
| PCA                           | $1.0 \times 10^{+00}$                       | <b><math>9.1 \times 10^{-07}</math></b> | <b><math>1.3 \times 10^{-06}</math></b>   | $1.0 \times 10^{+00}$                   | $1.0 \times 10^{+00}$                   | <b><math>1.2 \times 10^{-05}</math></b> | <b><math>9.1 \times 10^{-07}</math></b>             | $1.0 \times 10^{+00}$                   |
| Phenotypic Enhancement        | $1.0 \times 10^{+00}$                       | <b><math>2.1 \times 10^{-04}</math></b> | <b><math>1.3 \times 10^{-06}</math></b>   | $1.0 \times 10^{+00}$                   | <b><math>1.6 \times 10^{-05}</math></b> | $1.0 \times 10^{+00}$                   | <b><math>9.1 \times 10^{-07}</math></b>             | $1.0 \times 10^{+00}$                   |
| Phenotypic Suppression        | $1.0 \times 10^{+00}$                       | <b><math>3.0 \times 10^{-06}</math></b> | <b><math>6.5 \times 10^{-06}</math></b>   | $1.0 \times 10^{+00}$                   | <b><math>9.7 \times 10^{-05}</math></b> | $1.0 \times 10^{+00}$                   | <b><math>3.0 \times 10^{-06}</math></b>             | $1.0 \times 10^{+00}$                   |
| Positive Genetic              | $1.0 \times 10^{+00}$                       | <b><math>9.1 \times 10^{-07}</math></b> | <b><math>3.3 \times 10^{-06}</math></b>   | $1.0 \times 10^{+00}$                   | $8.9 \times 10^{-01}$                   | $1.1 \times 10^{-01}$                   | <b><math>9.3 \times 10^{-10}</math></b>             | $1.0 \times 10^{+00}$                   |

*Continued on next page*

|                              | Line cross & MI v. Line cross & Correlation |                       | Treatment & MI v. Treatment & Correlation |                       | Treatment & MI v. Line cross & MI |                       | Treatment & Correlation v. Line cross & Correlation |                       |
|------------------------------|---------------------------------------------|-----------------------|-------------------------------------------|-----------------------|-----------------------------------|-----------------------|-----------------------------------------------------|-----------------------|
| Protein-peptide              | $1.0 \times 10^{+00}$                       | $9.3 \times 10^{-10}$ | $1.6 \times 10^{-05}$                     | $1.0 \times 10^{+00}$ | $1.0 \times 10^{+00}$             | $1.4 \times 10^{-06}$ | $9.1 \times 10^{-07}$                               | $1.0 \times 10^{+00}$ |
| Protein-RNA                  | $1.0 \times 10^{+00}$                       | $4.4 \times 10^{-06}$ | $1.3 \times 10^{-03}$                     | $1.0 \times 10^{+00}$ | $9.1 \times 10^{-07}$             | $1.0 \times 10^{+00}$ | $9.1 \times 10^{-07}$                               | $1.0 \times 10^{+00}$ |
| Reconstituted Complex        | $1.0 \times 10^{+00}$                       | $3.0 \times 10^{-06}$ | $6.5 \times 10^{-06}$                     | $1.0 \times 10^{+00}$ | $1.0 \times 10^{+00}$             | $9.1 \times 10^{-07}$ | $4.4 \times 10^{-06}$                               | $1.0 \times 10^{+00}$ |
| Synthetic Growth Defect      | NA                                          | NA                    | NA                                        | NA                    | NA                                | NA                    | NA                                                  | NA                    |
| Synthetic Haploinsufficiency | $1.0 \times 10^{+00}$                       | $9.1 \times 10^{-07}$ | $4.3 \times 10^{-05}$                     | $1.0 \times 10^{+00}$ | $1.0 \times 10^{+00}$             | $9.3 \times 10^{-10}$ | $2.0 \times 10^{-06}$                               | $1.0 \times 10^{+00}$ |
| Synthetic Lethality          | NA                                          | NA                    | NA                                        | NA                    | NA                                | NA                    | NA                                                  | NA                    |
| Synthetic Rescue             | $1.0 \times 10^{+00}$                       | $9.3 \times 10^{-10}$ | $1.0 \times 10^{+00}$                     | $9.1 \times 10^{-07}$ | $9.5 \times 10^{-01}$             | $5.5 \times 10^{-02}$ | $9.3 \times 10^{-10}$                               | $1.0 \times 10^{+00}$ |
| Two-hybrid                   | $1.0 \times 10^{+00}$                       | $9.1 \times 10^{-07}$ | $4.0 \times 10^{-04}$                     | $1.0 \times 10^{+00}$ | $1.2 \times 10^{-03}$             | $1.0 \times 10^{+00}$ | $9.1 \times 10^{-07}$                               | $1.0 \times 10^{+00}$ |
| Significant differences      | 21                                          |                       | 19                                        |                       | 18                                |                       | 21                                                  |                       |

Supporting Table 2. *The number of known interactions of a given type and the number of genes from each of the two data sets that are involved in the corresponding interactions. There are 5,829 shared genes between the two data sets, with a total of 5,913 genes in the line cross data and a total of 6,207 genes in the treatment data.*

| Known interaction type        | Number of interactions | Number of genes from line cross data | Number of genes from treatment data |
|-------------------------------|------------------------|--------------------------------------|-------------------------------------|
| Affinity Capture-Luminescence | 32                     | 11                                   | 11                                  |
| Affinity Capture-MS           | 58,861                 | 3,972                                | 4,123                               |
| Affinity Capture-RNA          | 6,961                  | 3,044                                | 3,170                               |
| Affinity Capture-Western      | 12,165                 | 2,383                                | 2,470                               |
| Biochemical Activity          | 9,447                  | 1,820                                | 1,888                               |
| Co-purification               | 2,238                  | 871                                  | 898                                 |
| Co-crystal Structure          | 324                    | 220                                  | 224                                 |
| Co-fractionation              | 1,120                  | 557                                  | 572                                 |
| Co-localization               | 719                    | 353                                  | 366                                 |
| Dosage Growth Defect          | 476                    | 258                                  | 269                                 |
| Dosage Lethality              | 1,128                  | 505                                  | 521                                 |
| Dosage Rescue                 | 6,554                  | 1,930                                | 1,999                               |
| Far Western                   | 100                    | 74                                   | 80                                  |
| FRET                          | 194                    | 90                                   | 92                                  |
| PCA                           | 8,569                  | 1,474                                | 1,521                               |
| Phenotypic Enhancement        | 7,959                  | 1,885                                | 1,952                               |
| Phenotypic Suppression        | 5,672                  | 1,363                                | 1,406                               |
| Positive Genetic              | 24,810                 | 2,806                                | 2,915                               |
| Protein-RNA                   | 772                    | 380                                  | 391                                 |
| Protein-peptide               | 208                    | 112                                  | 116                                 |
| Reconstituted Complex         | 3,996                  | 1,374                                | 1,421                               |
| Synthetic Growth Defect       | 26,944                 | 2,869                                | 2,974                               |
| Synthetic Haploinsufficiency  | 396                    | 199                                  | 202                                 |
| Synthetic Lethality           | 20,899                 | 2,691                                | 2,792                               |
| Synthetic Rescue              | 5,606                  | 1,616                                | 1,673                               |
| Two-hybrid                    | 13,863                 | 3,152                                | 3,268                               |

#### Bibliography

Šidák, Z., 1967. Rectangular confidence regions for the means of multivariate normal distributions. *Journal of the American Statistical Association*, **62**(318), 626–633.
